# Supplementary material for: Antiviral Effect of Manganese against Foot-and-Mouth Disease Virus Both in PK15 Cells and Mice
Source: MDPI journal article supplement (doi:10.3390/v15020390), 2023-01-30
Supplement: s1 [file s1]

**Table S1.** Primers and probes used in this study.

| <b>Gene</b>   | <b>Primer/Probe</b> | <b>Sequence 5' to 3'</b> |
|---------------|---------------------|--------------------------|
| FMDV          | Forward primer      | ACTGGGTTTTAYAAACCTGTGATG |
|               | Reverse primer      | TCAACTTCTCCTGKATGGTCCCA  |
|               | Probe (6'FAM/MGB)   | ATCCTCTCCTTTGCACGC       |
| IFN- $\alpha$ | Forward primer      | TCTGCAAGGTCCCAATGG       |
|               | Reverse primer      | AGATGGCATTGCAGCTGAGTAG   |
| IFN- $\beta$  | Forward primer      | GCTAACAAGTGCATCCTCCAAA   |
|               | Reverse primer      | AGCACATCATAGCTCATGGAAAGA |
| Mx            | Forward primer      | GAGGTGGACCCCGAAGGA       |
|               | Reverse primer      | CACCAGATCCGGCTTCGT       |
| OAS           | Forward primer      | AAGCATCAGAAGCTTTGCATCTT  |
|               | Reverse primer      | CAGGCCTGGGTTTCTTGAGTT    |
| ISG54         | Forward primer      | CTGGCAAAGAGCCCTAAGGA     |
|               | Reverse primer      | CTCAGAGGGTCAATGGAATTCC   |
| CCL5          | Forward primer      | TACAGCTACCATGAAGGTCTCCAC |
|               | Reverse primer      | TGATGCTGGAGCGCAGAG       |
| GAPDH         | Forward primer      | ACATGGCCTCCAAGGAGTAAGA   |
|               | Reverse primer      | GATCGAGTTGGGGCTGTGACT    |
